# Supplementary material
Source: PubMed Central journal article supplement (PMC4564935)
Supplement: mmc1.pdf [file mmc1.pdf]

The American Journal of Human Genetics

Supplemental Data

## **A Point Mutation in *PDGFRB* Causes Autosomal-Dominant Penttinen Syndrome**

Jennifer J. Johnston, Monica Y. Sanchez-Contreras, Kim M. Keppler-Noreuil, Julie Sapp, Molly Crenshaw, NiCole A. Finch, Valerie Cormier-Daire, Rosa Rademakers, Virginia P. Sybert, and Leslie G. Biesecker

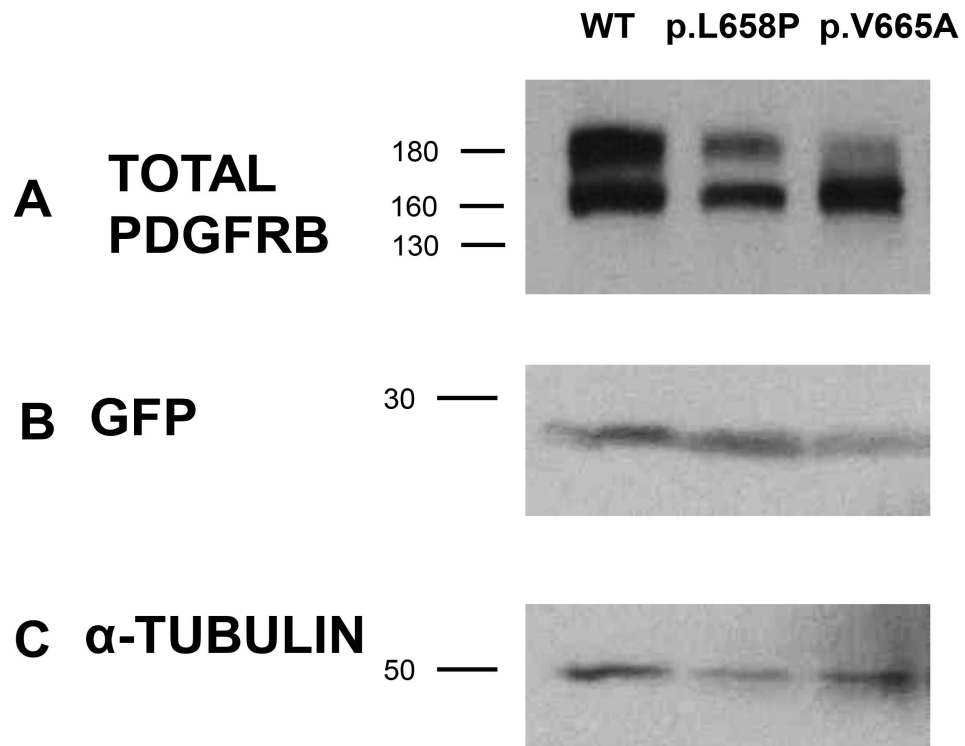

**D**

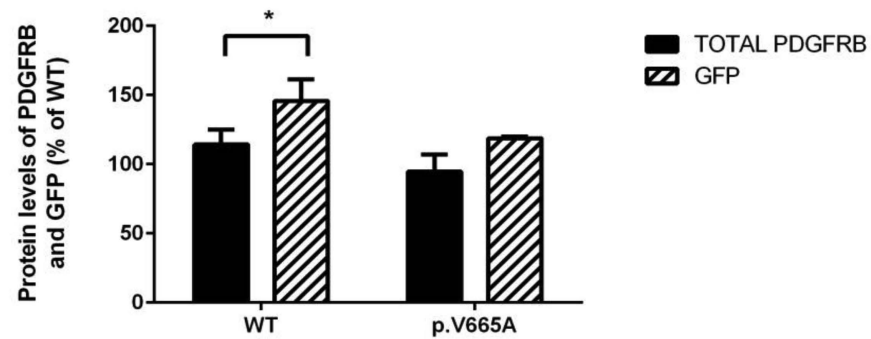

**E**

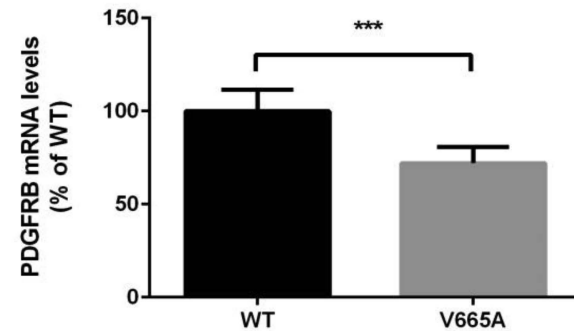

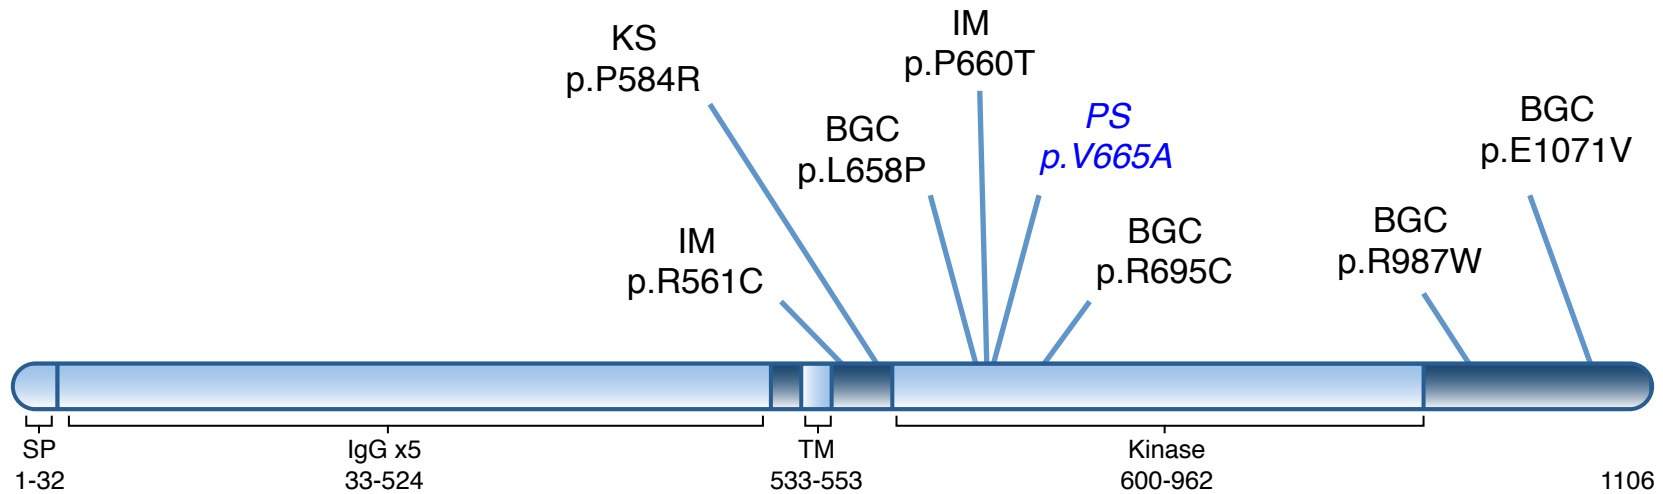

| Variant      | Disease                     | ExAC alleles* | Cellular Effect                                                                                     |
|--------------|-----------------------------|---------------|-----------------------------------------------------------------------------------------------------|
| p.Arg561Cys  | Infantile myofibromatosis   | 0             | Unknown                                                                                             |
| p.Pro584Arg  | Kosaki syndrome             | 0             | Unknown                                                                                             |
| p.Leu658Pro  | Basal ganglia calcification | 0             | Reduced protein levels, no phosphorylation with PDGFR-BB stimulation                                |
| p.Pro660Thr  | Infantile myofibromatosis   | 1             | Unknown                                                                                             |
| p.Val665Ala  | Penttinen syndrome          | 0             | Reduced protein levels, phosphorylation in absence of ligand, predominant species is immature 160kD |
| p.Arg695Cys  | Basal ganglia calcification | 10            | Reduced protein levels, reduced phosphorylation with PDGFR-BB stimulation                           |
| p.Arg987Trp  | Basal ganglia calcification | 2             | Reduced protein levels                                                                              |
| p.Glu1071Val | Basal ganglia calcification | 0             | Unknown                                                                                             |

\*Approximately 120,000 alleles were screened for each variants with the exception of p.Glu1071Val, for this variant approximately 85,000 alleles were screened.

**Fig S1. Co-transfection Efficiency and mRNA Expression studies of mutant vectors.**

Representative western blots showing total levels of PDGFRB (A), GFP (B) and  $\alpha$ -tubulin (C). Quantitative analysis of total PDGFRB and GFP observed by western blot (n=2) (D). Difference in protein level between wild-type and pVal665Ala construct was not found to be significant. Expression level of *PDGFRB* in cells transfected with wild-type or p.Val665Ala construct (E). p.Val665Ala construct was determined to express 28% less *PDGFRB* mRNA (P=0.0007, n=6).

**Fig. S2. Location of Mutations Identified in PDGFRB.** Eight mutations have been identified in *PDGFRB* in individuals with four distinct phenotypes. Protein alterations and corresponding phenotypes are shown above the protein model (IM, Infantile myofibromatosis; KS, Kosaki syndrome; BGC, Basal ganglia calcification; PS, Penttinen syndrome). Protein domains are indicated below the protein model and include the signal peptide (SP), extracellular immunoglobulin-like domains (IgG), trans membrane domain (TM) and split tyrosine-kinase domain. Allele counts for each variant as reported in ExAC and cellular effect if known are summarized in the table.

**Table S1. Quantitative analysis of the three maturation forms of total PDGFRB observed by Western Blot.** The percentage of the each PDGFRB band was calculated from the total PDGFRB in WT.

| <b>PDGFRB form</b>             | <b>WT<br/>(n=3)</b> | <b>p.L658P<br/>(n=3)</b>            | <b>p.V665A<br/>(n=3)</b>          |
|--------------------------------|---------------------|-------------------------------------|-----------------------------------|
| Total PDGFRB                   | 100.0%              | 71.8% ±1.9<br>( <b>&lt;0.0001</b> ) | 29.4% ±5<br>( <b>&lt;0.0001</b> ) |
| 180 kDa                        | 52.1% ±2            | 14.0% ±0.6                          | 5.5% ±0.9                         |
| 160 kDa                        | 45.9% ±3.2          | 55.1% ±1.6                          | 21.8% ±3.9                        |
| Ratio of 180 kDa/160 kDa forms | 1.1                 | 0.3<br>( <b>&lt;0.0001</b> )        | 0.3<br>( <b>&lt;0.0001</b> )      |

(Significant P values for difference between WT and mutant protein.)

**Table S2. Quantification of the time-dependent change in the PDGF-BB induced phosphorylation of PDGFRB and downstream pathways.** Data is expressed as the fold change (average  $\pm$  S.E.M.) in p-Tyr751 PDGFRB, p-Tyr1021 PDGFRB, pAKT, pSTAT3, pPLC $\gamma$ 1, pSRC and pERK immunoreactivity compared to total PDGFRB, AKT, STAT3, PLC $\gamma$ 1, SRC and ERK respectively.

|                                  | PDGF-BB Time Course                     |                                         |                                        |                                           |                                          |
|----------------------------------|-----------------------------------------|-----------------------------------------|----------------------------------------|-------------------------------------------|------------------------------------------|
|                                  | 0 min<br>(n=3)                          | 5 min<br>(n=3)                          | 15 min<br>(n=3)                        | 30 min<br>(n=3)                           | 60 min<br>(n=3)                          |
| <b>PDGFRB p-Tyr751/180</b>       |                                         |                                         |                                        |                                           |                                          |
| WT                               | 0.2 $\pm$ 0.1                           | 2 $\pm$ 0.4                             | 4.2 $\pm$ 1.1                          | 5.5 $\pm$ 0.7                             | 3.9 $\pm$ 0.5                            |
| V665A                            | 1 $\pm$ 0.2                             | 3.1 $\pm$ 0.6                           | 1.7 $\pm$ 0.1<br>( <b>&lt;0.05</b> )   | 1.4 $\pm$ 0.2<br>( <b>&lt;0.0001</b> )    | 1.3 $\pm$ 0.2<br>( <b>&lt;0.01</b> )     |
| <b>PDGFRB p-Tyr751/160</b>       |                                         |                                         |                                        |                                           |                                          |
| WT                               | 0.4 $\pm$ 0.1                           | 0.7 $\pm$ 0.2                           | 0.9 $\pm$ 0.3                          | 1.1 $\pm$ 0.2                             | 0.7 $\pm$ 0.1                            |
| V665A                            | 22.6 $\pm$ 1.2<br>( <b>&lt;0.0001</b> ) | 27.3 $\pm$ 5.8<br>( <b>&lt;0.0001</b> ) | 47 $\pm$ 2.3<br>( <b>&lt;0.0001</b> )  | 44.4 $\pm$ 3.4<br>( <b>&lt;0.0001</b> )   | 35.7 $\pm$ 2.8<br>( <b>&lt;0.0001</b> )  |
| <b>PDGFRB p-Tyr1021/180</b>      |                                         |                                         |                                        |                                           |                                          |
| WT                               | 0.1 $\pm$ 0.1                           | 1.3 $\pm$ 0.3                           | 6.5 $\pm$ 1.1                          | 10.5 $\pm$ 0.1                            | 8.7 $\pm$ 0.8                            |
| V665A                            | 1.7 $\pm$ 0.2                           | 3.2 $\pm$ 1.1                           | 1.8 $\pm$ 0.3<br>( <b>&lt;0.0001</b> ) | 1.7 $\pm$ 0.2<br>( <b>&lt;0.0001</b> )    | 1.4 $\pm$ 0.2<br>( <b>&lt;0.0001</b> )   |
| <b>PDGFRB p-Tyr1021/160</b>      |                                         |                                         |                                        |                                           |                                          |
| WT                               | 0.5 $\pm$ 0.2                           | 0.9 $\pm$ 0.1                           | 0.7 $\pm$ 0.3                          | 1.5 $\pm$ 0.4                             | 1 $\pm$ 0.2                              |
| V665A                            | 72.6 $\pm$ 6.2<br>( <b>&lt;0.001</b> )  | 78.2 $\pm$ 21<br>( <b>&lt;0.001</b> )   | 121 $\pm$ 3.8<br>( <b>&lt;0.0001</b> ) | 116.2 $\pm$ 16.7<br>( <b>&lt;0.0001</b> ) | 100.1 $\pm$ 8.6<br>( <b>&lt;0.0001</b> ) |
| <b>p-AKT</b>                     |                                         |                                         |                                        |                                           |                                          |
| WT                               | 17.2 $\pm$ 5                            | 232 $\pm$ 20.7                          | 304.4 $\pm$ 43.6                       | 239.6 $\pm$ 56.1                          | 201.6 $\pm$ 27                           |
| V665A                            | 73.7 $\pm$ 40                           | 237.6 $\pm$ 41                          | 241.5 $\pm$ 39.7                       | 134.4 $\pm$ 25.8                          | 93.8 $\pm$ 3                             |
| <b>p-STAT3</b>                   |                                         |                                         |                                        |                                           |                                          |
| WT                               | 34.4 $\pm$ 19.3                         | 69 $\pm$ 7.7                            | 276.2 $\pm$ 44.8                       | 204 $\pm$ 51.8                            | 137 $\pm$ 39.7                           |
| V665A                            | 155.6 $\pm$ 36.3                        | 253.1 $\pm$ 60.8<br>( <b>&lt;0.05</b> ) | 198.3 $\pm$ 42.2                       | 157.8 $\pm$ 26.3                          | 116.6 $\pm$ 12.2                         |
| <b>p-PLC<math>\gamma</math>1</b> |                                         |                                         |                                        |                                           |                                          |
| WT                               | 10.2 $\pm$ 6                            | 57.2 $\pm$ 14.3                         | 90.6 $\pm$ 14.6                        | 61.5 $\pm$ 8.4                            | 41.7 $\pm$ 7.6                           |
| V665A                            | 36.3 $\pm$ 1.8                          | 106 $\pm$ 9.5<br>( <b>&lt;0.01</b> )    | 83.1 $\pm$ 1.1                         | 65.9 $\pm$ 6.6                            | 58.3 $\pm$ 13                            |
| <b>p-SRC</b>                     |                                         |                                         |                                        |                                           |                                          |
| WT                               | 57.1 $\pm$ 17.8                         | 125.9 $\pm$ 36.8                        | 122.7 $\pm$ 32.4                       | 114.2 $\pm$ 33.7                          | 101.7 $\pm$ 32.7                         |
| V665A                            | 72.9 $\pm$ 20.2                         | 123.6 $\pm$ 36.1                        | 95.7 $\pm$ 26.2                        | 105.7 $\pm$ 36.4                          | 90.6 $\pm$ 25.2                          |
| <b>pERK</b>                      |                                         |                                         |                                        |                                           |                                          |
| WT                               | 56.2 $\pm$ 16.3                         | 1437 $\pm$ 261.3                        | 604.9 $\pm$ 119.5                      | 269.9 $\pm$ 127.7                         | 90.2 $\pm$ 20.6                          |
| V665A                            | 38.4 $\pm$ 10.7                         | 1136 $\pm$ 119.7                        | 801.2 $\pm$ 123.5                      | 129 $\pm$ 20.5                            | 87.2 $\pm$ 8                             |
